# Supplementary material
Source: publisher site journal article supplement (https://www.dovepress.com/article/398632)

| Supplementary Table 1. Baseline characteristics of high and low ALP groups after propensity score matching | | | | |
| --- | --- | --- | --- | --- |
| Variable | Total | ALP < 172 ng/ml | ALP ≥ 172 ng/ml | *p* |
| Patients | 852 | 426 | 426 |  |
| Male sex | 699 (82.0) | 350 (82.2) | 349 (81.9) | 1.000 |
| Age ≥ 60 years | 344 (40.4) | 174 (40.8) | 170 (39.9) | 0.829 |
| HBV | 435 (51.1) | 214 (50.2) | 221 (51.9) | 0.691 |
| HCV | 4 (0.5) | 3 (0.7) | 1 (0.2) | 0.625 |
| Alcohol | 316 (37.1) | 160 (37.6) | 156 (36.6) | 0.836 |
| Diabetes mellitus | 93 (10.9) | 46 (10.8) | 47 (11.0) | 1.000 |
| Hypertension | 149 (17.5) | 77 (18.1) | 72 (16.9) | 0.704 |
| Child–Pugh class |  |  |  | 0.189 |
| A | 566 (66.4) | 294 (69.0) | 272 (63.8) |  |
| B | 271 (31.8) | 123 (28.9) | 148 (34.7) |  |
| C | 15 (1.8) | 9 (2.1) | 6 (1.4) |  |
| ALBI grade |  |  |  | 0.458 |
| 1 | 176 (20.7) | 94 (22.1) | 82 (19.2) |  |
| 2 | 595 (69.8) | 292 (68.5) | 303 (71.1) |  |
| 3 | 81 (9.5) | 40 (9.4) | 41 (9.6) |  |
| ALP, median, U/L | 171.7 (117.0-257.6) | 117.0 (87.0-144.0) | 257.2 (203.8-364.0) |  |
| LDH, median, U/L | 232.0 (186.3-319.8) | 228.0 (181.0-310.5) | 234.0 (195.0-323.3) | 0.077 |
| Serum AFP, ng/ml |  |  |  | 0.640 |
| < 200 | 450 (52.8) | 225 (52.8) | 225 (52.8) |  |
| ≥ 200, < 400 | 44 (5.2) | 18 (4.2) | 26 (6.1) |  |
| ≥ 400 | 358 (42.0) | 183 (43) | 175 (41.1) |  |
| Platelet count ≥ 100 × 109/L | 625 (73.4) | 319 (74.9) | 306 (71.8) | 0.356 |
| ALT levels ≥ 40 U/L | 506 (59.4) | 256 (60.1) | 250 (58.7) | 0.695 |
| Leukocyte ≥ 4 × 109/L | 722 (84.7) | 362 (85.0) | 360 (84.5) | 0.922 |
| BCLC stage |  |  |  | 0.840 |
| 0/A | 107 (12.6) | 50 (11.7) | 57 (13.4) |  |
| B | 102 (12.0) | 49 (11.5) | 53 (12.4) |  |
| C | 628 (73.7) | 318 (74.6) | 310 (72.8) |  |
| D | 15 (1.8) | 9 (2.1) | 6 (1.4) |  |
| Number of tumors ≥ 2 | 607 (71.2) | 298 (70.0) | 309 (72.5) | 0.410 |
| Tumor diameter, cm |  |  |  | 0.084 |
| < 3 | 104 (12.2) | 40 (9.4) | 64 (15.0) |  |
| ≥ 3, < 5 | 155 (18.2) | 76 (17.8) | 79 (18.5) |  |
| ≥ 5, < 10 | 349 (41.0) | 195 (45.8) | 154 (36.2) |  |
| ≥ 10 | 244 (28.6) | 115 (27.0) | 129 (30.3) |  |
| PVTT | 381 (44.7) | 196 (46.0) | 185 (43.4) | 0.450 |
| Lymph node metastasis | 432 (50.7) | 227 (53.3) | 205 (48.1) | 0.141 |
| Extrahepatic metastases | 218 (25.6) | 109 (25.6) | 109 (25.6) | 1.000 |
| Lung | 129 (15.1) | 62 (14.6) | 67 (15.7) | 0.699 |
| Bone | 63 (7.4) | 31 (7.3) | 32 (7.5) | 1.000 |
| Other | 80 (9.4) | 41 (9.6) | 39 (9.2) | 0.909 |
| Treatments |  |  |  | 0.852 |
| Supportive care | 224 (26.3) | 103 (24.2) | 121 (28.4) |  |
| Liver resection | 97 (11.4) | 50 (11.7) | 47 (11.0) |  |
| RFA | 12 (1.4) | 6 (1.4) | 6 (1.4) |  |
| TACE | 295 (34.6) | 149 (35) | 146 (34.3) |  |
| Targeted therapy+ ICI | 36 (4.2) | 18 (4.2) | 18 (4.2) |  |
| Adjuvant TACE | 14 (1.6) | 9 (2.1) | 5 (1.2) |  |
| Other | 174 (20.4) | 91 (21.4) | 83 (19.5) |  |
| Abbreviations: HBV, hepatitis B virus; HCV, hepatitis C virus; ALBI, albumin-bilirubin; ALP, alkaline phosphatase; LDH, lactate dehydrogenase; AFP, alpha-fetoprotein; ALT, alanine aminotransferase; BCLC, Barcelona Clinic Liver Cancer; PVTT, portal vein tumor thrombus; RFA, radiofrequency ablation; TACE, transcatheter arterial chemoembolization; ICI, immune checkpoint inhibitor. | | | | |

| Supplementary Table 2. Baseline characteristics of high and low LDH groups after propensity score matching | | | | |
| --- | --- | --- | --- | --- |
| Variable | Total | LDH < 241 ng/ml | LDH ≥ 241 ng/ml | *p* |
| Patients | 1386 | 693 | 693 |  |
| Male sex | 1116 (80.5) | 560 (80.8) | 556 (80.2) | 0.840 |
| Age ≥ 60 years | 561 (40.5) | 283 (40.8) | 278 (40.1) | 0.825 |
| HBV | 20 (1.4) | 370 (53.4) | 370 (53.4) | 1.000 |
| HCV | 499 (36) | 10 (1.4) | 10 (1.4) | 1.000 |
| Alcohol | 152 (11) | 243 (35.1) | 256 (36.9) | 0.500 |
| Diabetes mellitus | 237 (17.1) | 84 (12.1) | 68 (9.8) | 0.211 |
| Hypertension | 1116 (80.5) | 123 (17.7) | 114 (16.5) | 0.569 |
| Child–Pugh class |  |  |  | 0.396 |
| A | 919 (66.3) | 468 (67.5) | 451 (65.1) |  |
| B | 432 (31.2) | 209 (30.2) | 223 (32.2) |  |
| C | 35 (2.5) | 16 (2.3) | 19 (2.7) |  |
| ALBI grade |  |  |  | 0.139 |
| 1 | 341 (24.6) | 187 (27) | 154 (22.2) |  |
| 2 | 903 (65.2) | 434 (62.6) | 469 (67.7) |  |
| 3 | 142 (10.2) | 72 (10.4) | 70 (10.1) |  |
| ALP, median, U/L | 151.0 (102.0-253.0) | 145.0 (94.5-250.5) | 154.0 (108.0-258.5) | 0.087 |
| LDH, median, U/L | 240.5 (188.0-320.0) | 188.0 (160.5-211.0) | 320.0 (272.0-431.0) |  |
| Serum AFP, ng/ml |  |  |  | 0.280 |
| < 200 | 698 (50.4) | 345 (49.8) | 353 (50.9) |  |
| ≥ 200, < 400 | 72 (5.2) | 40 (5.8) | 32 (4.6) |  |
| ≥ 400 | 616 (44.4) | 308 (44.4) | 308 (44.4) |  |
| Platelet count ≥ 100 × 109/L | 1018 (73.4) | 512 (73.9) | 506 (73.0) | 0.769 |
| ALT levels ≥ 40 U/L | 834 (60.2) | 423 (61) | 411 (59.3) | 0.521 |
| Leukocyte ≥ 4 × 109/L | 1207 (87.1) | 607 (87.6) | 600 (86.6) | 0.634 |
| BCLC stage |  |  |  | 0.143 |
| 0/A | 214 (15.4) | 104 (15.0) | 110 (15.9) |  |
| B | 194 (14.0) | 110 (15.9) | 84 (12.1) |  |
| C | 943 (68.0) | 463 (66.8) | 480 (69.3) |  |
| D | 35 (2.5) | 16 (2.3) | 19 (2.7) |  |
| Number of tumors ≥ 2 | 977 (70.5) | 487 (70.3) | 490 (70.7) | 0.899 |
| Tumor diameter, cm |  |  |  | 0.065 |
| < 3 | 159 (11.5) | 67 (9.7) | 92 (13.3) |  |
| ≥ 3, < 5 | 280 (20.2) | 143 (20.6) | 137 (19.8) |  |
| ≥ 5, < 10 | 572 (41.3) | 307 (44.3) | 265 (38.2) |  |
| ≥ 10 | 375 (27.1) | 176 (25.4) | 199 (28.7) |  |
| PVTT | 580 (41.8) | 284 (41.0) | 296 (42.7) | 0.513 |
| Lymph node metastasis | 658 (47.5) | 327 (47.2) | 331 (47.8) | 0.867 |
| Extrahepatic metastases | 337 (24.3) | 163 (23.5) | 174 (25.1) | 0.534 |
| Lung | 202 (14.6) | 97 (14.0) | 105 (15.2) | 0.587 |
| Bone | 92 (6.6) | 43 (6.2) | 49 (7.1) | 0.594 |
| Other | 118 (8.5) | 52 (7.5) | 66 (9.5) | 0.202 |
| Treatments |  |  |  | 0.340 |
| Supportive care | 348 (25.1) | 170 (24.5) | 178 (25.7) |  |
| Liver resection | 191 (13.8) | 95 (13.7) | 96 (13.9) |  |
| RFA | 41 (3.0) | 19 (2.7) | 22 (3.2) |  |
| TACE | 461 (33.3) | 232 (33.5) | 229 (33.0) |  |
| Targeted therapy+ ICI | 46 (3.3) | 23 (3.3) | 23 (3.3) |  |
| Adjuvant TACE | 42 (3.0) | 25 (3.6) | 17 (2.5) |  |
| Other | 257 (18.5) | 170 (24.5) | 178 (25.7) |  |
| Abbreviations: HBV, hepatitis B virus; HCV, hepatitis C virus; ALBI, albumin-bilirubin; ALP, alkaline phosphatase; LDH, lactate dehydrogenase; AFP, alpha-fetoprotein; ALT, alanine aminotransferase; BCLC, Barcelona Clinic Liver Cancer; PVTT, portal vein tumor thrombus; RFA, radiofrequency ablation; TACE, transcatheter arterial chemoembolization; ICI, immune checkpoint inhibitor. | | | | |

| Supplementary Table 3. Univariate and multivariate Cox regression analysis of overall survival of ALP after PSM | | | | | | | |
| --- | --- | --- | --- | --- | --- | --- | --- |
|  | Univariable Cox regression | | |  | Multivariable Cox regression | | |
| Variable | HR | 95%CI | *p* |  | HR | 95%CI | *p* |
| Sex (male/female) | 1.050 | 0.817-1.349 | 0.704 |  |  |  |  |
| Age (≥60/<60 years) | 1.064 | 0.876-1.291 | 0.533 |  |  |  |  |
| HBV (positive/negative) | 1.069 | 0.883-1.294 | 0.496 |  |  |  |  |
| Alcoholism (positive/negative) | 1.212 | 0.998-1.472 | 0.052 |  |  |  |  |
| Diabetes mellitus (positive/negative) | 1.142 | 0.847-1.538 | 0.384 |  |  |  |  |
| Hypertension (positive/negative) | 0.883 | 0.681-1.145 | 0.347 |  |  |  |  |
| Child-Pugh class (B + C/A) | 1.554 | 1.278-1.888 | <0.001 |  | 1.207 | 0.982-1.483 | 0.074 |
| ALBI grade (2+3/1) | 1.270 | 0.993-1.625 | 0.057 |  |  |  |  |
| ALP (≥ 172/< 172 U/L) | 2.504 | 2.048-3.063 | <0.001 |  | 2.567 | 2.093-3.149 | <0.001 |
| LDH (≥ 241/241 U/L) | 1.658 | 1.368-2.008 | <0.001 |  | 1.467 | 1.206-1.786 | <0.001 |
| AFP (≥ 400/< 400 ng/ml) | 1.056 | 0.871-1.281 | 0.578 |  |  |  |  |
| Platelet (< 100000/≥ 100000/μL) | 1.060 | 0.855-1.313 | 0.597 |  |  |  |  |
| ALT (≥ 40/< 40 U/L) | 0.977 | 0.804-1.188 | 0.817 |  |  |  |  |
| Leukocyte (< 4000/≥ 4000/μL) | 0.783 | 0.594-1.033 | 0.084 |  |  |  |  |
| BCLC stage |  |  | <0.001 |  |  |  | 0.654 |
| 0/A | 1.000 |  |  |  | 1.000 |  |  |
| B | 1.291 | 0.822-2.026 | 0.268 |  | 1.021 | 0.613-1.702 | 0.936 |
| C | 2.007 | 1.417-2.843 | <0.001 |  | 1.092 | 0.679-1.755 | 0.716 |
| D | 3.073 | 1.476-6.395 | 0.003 |  | 1.621 | 0.745-3.526 | 0.223 |
| Number of tumor (≥ 2/< 2) | 1.574 | 1.255-1.975 | <0.001 |  | 1.278 | 0.985-1.658 | 0.065 |
| Tumor diameter (≥ 5/< 5 cm) | 1.257 | 1.016-1.555 | 0.035 |  | 1.194 | 0.952-1.496 | 0.125 |
| PVTT (positive/negative) | 1.709 | 1.411-2.07 | <0.001 |  | 1.649 | 1.308-2.079 | <0.001 |
| Lymph node metastasis (yes/no) | 1.234 | 1.019-1.495 | 0.032 |  | 1.084 | 0.860-1.366 | 0.496 |
| Extrahepatic metastases (yes/no) | 1.623 | 1.321-1.994 | <0.001 |  | 1.416 | 1.133-1.769 | 0.002 |
| Antitumor therapy (no/yes) | 2.226 | 1.821-2.720 | <0.001 |  | 2.167 | 1.762-2.666 | <0.001 |
| Abbreviations: PSM, propensity score matching; HBV, hepatitis B virus; ALBI, albumin-bilirubin; ALP, alkaline phosphatase; LDH, lactate dehydrogenase; AFP, alpha-fetoprotein; ALT, alanine aminotransferase; BCLC, Barcelona Clinic Liver Cancer; PVTT, portal vein tumor thrombus. | | | | | | | |

| Supplementary Table 4. Univariate and multivariate Cox regression analysis of overall survival of LDH after PSM | | | | | | | |
| --- | --- | --- | --- | --- | --- | --- | --- |
|  | Univariable Cox regression | | |  | Multivariable Cox regression | | |
| Variable | HR | 95%CI | *p* |  | HR | 95%CI | *p* |
| Sex (male/female) | 1.026 | 0.848-1.242 | 0.791 |  |  |  |  |
| Age (≥60/<60 years) | 0.956 | 0.819-1.117 | 0.574 |  |  |  |  |
| HBV (positive/negative) | 1.017 | 0.874-1.185 | 0.824 |  |  |  |  |
| HCV (positive/negative) | 0.338 | 0.127-0.904 | 0.031 |  | 0.613 | 0.228-1.647 | 0.331 |
| Alcoholism (positive/negative) | 1.130 | 0.967-1.321 | 0.125 |  |  |  |  |
| Diabetes mellitus (positive/negative) | 1.128 | 0.887-1.435 | 0.325 |  |  |  |  |
| Hypertension (positive/negative) | 0.802 | 0.646-0.996 | 0.046 |  | 0.888 | 0.714-1.105 | 0.286 |
| Child-Pugh class (B + C/A) | 1.812 | 1.553-2.114 | <0.001 |  | 1.277 | 1.069-1.526 | 0.007 |
| ALBI grade (2+3/1) | 1.681 | 1.384-2.042 | <0.001 |  | 1.007 | 0.811-1.250 | 0.950 |
| ALP (≥ 172/< 172 U/L) | 2.684 | 2.301-3.132 | <0.001 |  | 1.825 | 1.542-2.160 | <0.001 |
| LDH (≥ 241/241 U/L) | 1.897 | 1.624-2.216 | <0.001 |  | 1.895 | 1.621-2.215 | <0.001 |
| AFP (≥ 400/< 400 ng/ml) | 1.127 | 0.968-1.312 | 0.122 |  |  |  |  |
| Platelet (< 100000/≥ 100000/μL) | 0.961 | 0.808-1.143 | 0.653 |  |  |  |  |
| ALT (≥ 40/< 40 U/L) | 1.136 | 0.971-1.330 | 0.111 |  |  |  |  |
| Leukocyte (< 4000/≥ 4000/μL) | 0.816 | 0.645-1.034 | 0.092 |  |  |  |  |
| BCLC stage |  |  | <0.001 |  |  |  | 0.132 |
| 0/A | 1.000 |  |  |  | 1.000 |  |  |
| B | 1.443 | 0.999-2.085 | 0.051 |  | 0.977 | 0.643-1.486 | 0.914 |
| C | 3.077 | 2.308-4.103 | <0.001 |  | 1.398 | 0.954-2.048 | 0.085 |
| D | 5.113 | 3.147-8.310 | <0.001 |  | 1.249 | 0.719-2.171 | 0.430 |
| Number of tumor (≥ 2/< 2) | 1.900 | 1.574-2.293 | <0.001 |  | 1.472 | 1.183-1.832 | 0.001 |
| Tumor diameter (≥ 5/< 5 cm) | 1.656 | 1.388-1.976 | <0.001 |  | 1.434 | 1.193-1.723 | <0.001 |
| PVTT (positive/negative) | 2.148 | 1.844-2.503 | <0.001 |  | 1.401 | 1.164-1.685 | <0.001 |
| Lymph node metastasis (yes/no) | 1.555 | 1.335-1.812 | <0.001 |  | 0.952 | 0.792-1.144 | 0.599 |
| Extrahepatic metastases (yes/no) | 1.931 | 1.643-2.271 | <0.001 |  | 1.285 | 1.078-1.532 | 0.005 |
| Antitumor therapy (no/yes) | 2.182 | 1.858-2.562 | <0.001 |  | 1.826 | 1.540-2.165 | <0.001 |
| Abbreviations: PSM, propensity score matching; HBV, hepatitis B virus; HCV, hepatitis C virus; ALBI, albumin-bilirubin; ALP, alkaline phosphatase; LDH, lactate dehydrogenase; AFP, alpha-fetoprotein; ALT, alanine aminotransferase; BCLC, Barcelona Clinic Liver Cancer; PVTT, portal vein tumor thrombus. | | | | | | | |

| Supplementary Table 5. Univariate and multivariate logistic regression analysis of ALP level | | | | | | | |
| --- | --- | --- | --- | --- | --- | --- | --- |
|  | Univariable Cox regression | | |  | Multivariable Cox regression | | |
| Variable | HR | 95%CI | *p* |  | HR | 95%CI | *p* |
| Sex (male/female) | 1.133 | 0.909-1.411 | 0.267 |  |  |  |  |
| Age (≥60/<60 years) | 0.871 | 0.733-1.036 | 0.120 |  |  |  |  |
| HBV (positive/negative) | 0.762 | 0.643-0.904 | 0.002 |  | 0.625 | 0.507-0.771 | <0.001 |
| HCV (positive/negative) | 0.047 | 0.006-0.346 | 0.003 |  | 0.031 | 0.004-0.244 | 0.001 |
| Alcoholism (positive/negative) | 1.112 | 0.933-1.325 | 0.235 |  |  |  |  |
| Diabetes mellitus (positive/negative) | 0.846 | 0.637-1.126 | 0.251 |  |  |  |  |
| Hypertension (positive/negative) | 0.858 | 0.680-1.084 | 0.199 |  |  |  |  |
| Child-Pugh class (B + C/A) | 4.589 | 3.800-5.542 | <0.001 |  | 2.756 | 2.179-3.487 | <0.001 |
| ALBI grade (2+3/1) | 4.121 | 3.272-5.189 | <0.001 |  | 1.961 | 1.495-2.574 | <0.001 |
| LDH (≥ 241/ 241 U/L) | 2.994 | 2.509-3.573 | <0.001 |  | 1.556 | 1.258-1.924 | <0.001 |
| AFP (≥ 400/< 400 ng/ml) | 1.426 | 1.199-1.695 | <0.001 |  | 0.912 | 0.735-1.131 | 0.402 |
| Platelet (< 100000/≥ 100000/μL) | 0.625 | 0.513-0.760 | <0.001 |  | 0.618 | 0.480-0.797 | <0.001 |
| ALT (≥ 40/< 40 U/L) | 3.729 | 3.102-4.482 | <0.001 |  | 3.199 | 2.584-3.960 | <0.001 |
| Leukocyte (< 4000/≥ 4000/μL) | 0.589 | 0.463-0.750 | <0.001 |  | 0.765 | 0.561-1.043 | 0.091 |
| BCLC stage |  |  | <0.001 |  |  |  | 0.308 |
| 0/A | 1.000 |  |  |  |  |  |  |
| B | 1.327 | 0.923-1.909 | 0.127 |  | 0.854 | 0.536-1.361 | 0.507 |
| C | 4.120 | 3.143-5.401 | <0.001 |  | 1.279 | 0.820-1.993 | 0.278 |
| D | 9.731 | 5.522-17.147 | <0.001 |  | 1.349 | 0.662-2.746 | 0.410 |
| Number of tumor (≥ 2/< 2) | 2.071 | 1.706-2.515 | <0.001 |  | 1.332 | 1.019-1.742 | 0.036 |
| Tumor diameter (≥ 5/< 5 cm) | 2.370 | 1.973-2.846 | <0.001 |  | 1.441 | 1.149-1.807 | 0.002 |
| PVTT (positive/negative) | 3.167 | 2.650-3.784 | <0.001 |  | 2.000 | 1.542-2.595 | <0.001 |
| Lymph node metastasis (yes/no) | 2.199 | 1.849-2.615 | <0.001 |  | 1.279 | 0.982-1.665 | 0.068 |
| Extrahepatic metastases (yes/no) | 2.362 | 1.940-2.876 | <0.001 |  | 1.526 | 1.185-1.965 | 0.001 |
| Abbreviations: HBV, hepatitis B virus; ALBI, albumin-bilirubin; ALP, alkaline phosphatase; LDH, lactate dehydrogenase; AFP, alpha-fetoprotein; ALT, alanine aminotransferase; BCLC, Barcelona Clinic Liver Cancer; PVTT, portal vein tumor thrombus. | | | | | | | |

| Supplementary Table 6. Univariate and multivariate logistic regression analysis of LDH level | | | | | | | |
| --- | --- | --- | --- | --- | --- | --- | --- |
|  | Univariable Cox regression | | |  | Multivariable Cox regression | | |
| Variable | HR | 95%CI | *p* |  | HR | 95%CI | *p* |
| Sex (male/female) | 1.001 | 0.809-1.238 | 0.993 |  | 0.535 | 0.394-0.726 | <0.001 |
| Age (≥60/<60 years) | 0.847 | 0.715-1.004 | 0.055 |  | 1.422 | 1.137-1.778 | 0.002 |
| HBV (positive/negative) | 1.081 | 0.914-1.278 | 0.362 |  |  |  |  |
| HCV (positive/negative) | 0.609 | 0.302-1.230 | 0.167 |  | 0.464 | 0.231-0.932 | 0.031 |
| Alcoholism (positive/negative) | 0.967 | 0.814-1.149 | 0.705 |  | 0.786 | 0.629-0.981 | 0.033 |
| Diabetes mellitus (positive/negative) | 0.973 | 0.740-1.279 | 0.842 |  |  |  |  |
| Hypertension (positive/negative) | 1.029 | 0.822-1.287 | 0.804 |  | 1.358 | 1.004-1.837 | 0.047 |
| Child-Pugh class (B + C/A) | 2.493 | 2.079-2.989 | <0.001 |  | 1.617 | 1.291-2.024 | <0.001 |
| ALBI grade (2+3/1) | 2.267 | 1.860-2.763 | <0.001 |  | 1.307 | 1.035-1.65 | 0.024 |
| ALP (≥ 172/< 172 U/L) | 2.994 | 2.509-3.573 | <0.001 |  | 1.534 | 1.243-1.893 | <0.001 |
| AFP (≥ 400/< 400 ng/ml) | 2.074 | 1.748-2.461 | <0.001 |  | 1.709 | 1.414-2.066 | <0.001 |
| Platelet (< 100000/≥ 100000/μL) | 0.772 | 0.640-0.931 | 0.007 |  | 0.981 | 0.784-1.227 | 0.865 |
| ALT (≥ 40/< 40 U/L) | 2.502 | 2.105-2.973 | <0.001 |  | 1.853 | 1.529-2.245 | <0.001 |
| Leukocyte (< 4000/≥ 4000/μL) | 0.485 | 0.381-0.616 | <0.001 |  | 0.480 | 0.362-0.636 | <0.001 |
| BCLC stage |  |  | <0.001 |  |  |  | 0.267 |
| 0/A | 1.000 |  |  |  | 1.000 |  |  |
| B | 1.132 | 0.826-1.552 | 0.440 |  | 0.707 | 0.475-1.051 | 0.086 |
| C | 2.417 | 1.913-3.054 | <0.001 |  | 0.954 | 0.647-1.405 | 0.810 |
| D | 4.718 | 2.744-8.111 | <0.001 |  | 1.109 | 0.579-2.123 | 0.756 |
| Number of tumor (≥ 2/< 2) | 1.696 | 1.411-2.038 | <0.001 |  | 1.281 | 1.004-1.636 | 0.047 |
| Tumor diameter (≥ 5/< 5 cm) | 2.710 | 2.263-3.245 | <0.001 |  | 1.957 | 1.599-2.395 | <0.001 |
| PVTT (positive/negative) | 2.363 | 1.986-2.811 | <0.001 |  | 1.341 | 1.054-1.706 | 0.017 |
| Lymph node metastasis (yes/no) | 1.661 | 1.404-1.965 | <0.001 |  | 1.049 | 0.818-1.345 | 0.706 |
| Extrahepatic metastases (yes/no) | 1.590 | 1.309-1.932 | <0.001 |  | 1.020 | 0.805-1.293 | 0.867 |
| Abbreviations: HBV, hepatitis B virus; HCV, hepatitis C virus; ALBI, albumin-bilirubin; ALP, alkaline phosphatase; LDH, lactate dehydrogenase; AFP, alpha-fetoprotein; ALT, alanine aminotransferase; BCLC, Barcelona Clinic Liver Cancer; PVTT, portal vein tumor thrombus. | | | | | | | |

| Supplementary Table 7. Baseline characteristics of the training cohort and validation cohort | | | |
| --- | --- | --- | --- |
| Variable | Training cohort | Validation cohort | *p* |
| Patients | 1629 | 698 |  |
| Male sex | 1310(80.4) | 576(82.5) | 0.235 |
| Age ≥ 60 years | 690(42.4) | 282(40.4) | 0.381 |
| HBV | 878(53.9) | 376(53.9) | 0.989 |
| HCV | 26(1.6) | 13(1.9) | 0.646 |
| Alcohol | 620(38.1) | 247(35.4) | 0.222 |
| Diabetes mellitus | 182(11.2) | 60(8.6) | 0.062 |
| Hypertension | 268(16.5) | 116(16.6) | 0.921 |
| Child–Pugh class |  |  | 0.462 |
| A | 1141(70.0) | 486(69.6) |  |
| B | 447(27.4) | 188(26.9) |  |
| C | 41(2.5) | 24(3.4) |  |
| ALBI grade |  |  | 0.367 |
| 1 | 455(27.9) | 215(30.8) |  |
| 2 | 1014(62.2) | 419(60.0) |  |
| 3 | 160(9.8) | 64(9.2) |  |
| ALP, median, U/L | 562(34.5) | 256(36.7) | 0.314 |
| LDH, median, U/L | 643(39.5) | 265(38.0) | 0.495 |
| Serum AFP, ng/ml |  |  | 0.344 |
| < 200 | 917(56.3) | 372(53.3) |  |
| ≥ 200, < 400 | 90(5.5) | 37(5.3) |  |
| ≥ 400 | 622(38.2) | 289(41.4) |  |
| Platelet count ≥ 100 × 109/L | 1159(71.1) | 502(71.9) | 0.706 |
| ALT levels ≥ 40 U/L | 842(51.7) | 363(52.0) | 0.888 |
| Leukocyte ≥ 4 × 109/L | 1343(82.4) | 581(83.2) | 0.643 |
| BCLC stage |  |  | 0.232 |
| 0/A | 336(20.6) | 126(18.1) |  |
| B | 233(14.3) | 113(16.2) |  |
| C | 1019(62.6) | 435(62.3) |  |
| D | 41(2.5) | 24(3.4) |  |
| Number of tumors ≥ 2 | 1099(67.5) | 474(67.9) | 0.834 |
| Tumor diameter, cm |  |  | 0.212 |
| < 3 | 298(18.3) | 110(15.8) |  |
| ≥ 3, < 5 | 373(22.9) | 165(23.6) |  |
| ≥ 5, < 10 | 577(35.4) | 273(39.1) |  |
| ≥ 10 | 381(23.4) | 150(21.5) |  |
| PVTT | 588(36.1) | 265(38) | 0.391 |
| Lymph node metastasis | 713(43.8) | 309(44.3) | 0.824 |
| Extrahepatic metastases | 381(23.4) | 156(22.3) | 0.586 |
| Lung | 220(13.5) | 91(13.0) | 0.761 |
| Bone | 108(6.6) | 41(5.9) | 0.495 |
| Other | 133(8.2) | 65(9.3) | 0.363 |
| Treatments |  |  | 0.348 |
| Supportive care | 397(24.4) | 178(25.5) |  |
| Liver resection | 233(14.3) | 97(13.9) |  |
| RFA | 73(4.5) | 17(2.4) |  |
| TACE | 492(30.2) | 210(30.1) |  |
| Targeted therapy+ ICI | 60(3.7) | 24(3.4) |  |
| Adjuvant TACE | 59(3.6) | 31(4.4) |  |
| Other | 315(19.3) | 141(20.2) |  |
| Abbreviations: HBV, hepatitis B virus; HCV, hepatitis C virus; ALBI, albumin-bilirubin; ALP, alkaline phosphatase; LDH, lactate dehydrogenase; AFP, alpha-fetoprotein; ALT, alanine aminotransferase; BCLC, Barcelona Clinic Liver Cancer; PVTT, portal vein tumor thrombus; RFA Radio Frequency Ablation; TACE, transcatheter arterial chemoembolization; ICI, immune checkpoint inhibitor. | | | |

| Supplementary Table 8. Baseline characteristics based on ALP/LDH grouping | | | |
| --- | --- | --- | --- |
| Variable | ALP/LDH < 0.91 | ALP/LDH ≥ 0.91 | *p* |
| Patients | 1750 | 577 |  |
| Male sex | 1405 (80.3) | 481 (83.4) | 0.102 |
| Age ≥ 60 years | 727 (41.5) | 245 (42.5) | 0.698 |
| HBV | 987 (56.4) | 267 (46.3) | <0.001 |
| HCV | 37 (2.1) | 2 (0.3) | 0.004 |
| Alcohol | 638 (36.5) | 229 (39.7) | 0.164 |
| Diabetes mellitus | 179 (10.2) | 63 (10.9) | 0.638 |
| Hypertension | 293 (16.7) | 91 (15.8) | 0.586 |
| Child–Pugh class |  |  | <0.001 |
| A | 1346 (76.9) | 281 (48.7) |  |
| B | 368 (21) | 267 (46.3) |  |
| C | 36 (2.1) | 29 (5.0) |  |
| ALBI grade |  |  | <0.001 |
| 1 | 594 (33.9) | 76 (13.2) |  |
| 2 | 1050 (60.0) | 383 (66.4) |  |
| 3 | 106 (6.1) | 118 (20.5) |  |
| Serum AFP, ng/ml |  |  | 0.297 |
| < 200 | 957 (54.7) | 332 (57.5) |  |
| ≥ 200, < 400 | 95 (5.4) | 32 (5.5) |  |
| ≥ 400 | 698 (39.9) | 213 (36.9) |  |
| Platelet count ≥ 100 × 109/L | 1216 (69.5) | 445 (77.1) | <0.001 |
| ALT levels ≥ 40 U/L | 811 (46.3) | 394 (68.3) | <0.001 |
| Leukocyte ≥ 4 × 109/L | 1428 (81.6) | 496 (86) | 0.016 |
| BCLC stage |  |  | <0.001 |
| 0/A | 399 (22.8) | 63 (10.9) |  |
| B | 289 (16.5) | 57 (9.9) |  |
| C | 1026 (58.6) | 428 (74.2) |  |
| D | 36 (2.1) | 29 (5.0) |  |
| Number of tumors ≥ 2 | 1144 (65.4) | 429 (74.4) | <0.001 |
| Tumor diameter, cm |  |  | <0.001 |
| < 3 | 328 (18.7) | 80 (13.9) |  |
| ≥ 3, < 5 | 434 (24.8) | 104 (18) |  |
| ≥ 5, < 10 | 635 (36.3) | 215 (37.3) |  |
| ≥ 10 | 353 (20.2) | 178 (30.8) |  |
| PVTT | 569 (32.5) | 284 (49.2) | <0.001 |
| Lymph node metastasis | 703 (40.2) | 319 (55.3) | <0.001 |
| Extrahepatic metastases | 360 (20.6) | 177 (30.7) | <0.001 |
| Lung | 208 (11.9) | 103 (17.9) |  |
| Bone | 99 (5.7) | 50 (8.7) |  |
| Other | 131 (7.5) | 67 (11.6) |  |
| Treatments |  |  | <0.001 |
| Supportive care | 368 (21.0) | 207 (35.9) |  |
| Liver resection | 283 (16.2) | 47 (8.1) |  |
| RFA | 88 (5.0) | 2 (0.3) |  |
| TACE | 528 (30.2) | 174 (30.2) |  |
| Targeted therapy + ICI | 57 (3.3) | 27 (4.7) |  |
| Adjuvant TACE | 83 (4.7) | 7 (1.2) |  |
| Other | 343 (19.6) | 113 (19.6) |  |
| Abbreviations: HBV, hepatitis B virus; HCV, hepatitis C virus; ALBI, albumin–bilirubin; ALP, alkaline phosphatase; LDH, lactate dehydrogenase; AFP, alpha-fetoprotein; ALT, alanine aminotransferase; BCLC, Barcelona Clinic Liver Cancer; PVTT, portal vein tumor thrombus; RFA, radiofrequency ablation; TACE, transcatheter arterial chemoembolization; ICI, immune checkpoint inhibitor. | | | |

| Supplementary Table 9. Univariate and multivariate logistic regression analysis for ALP/LDH | | | | | | | |
| --- | --- | --- | --- | --- | --- | --- | --- |
|  | Univariable Cox regression | | |  | Multivariable Cox regression | | |
| Variable | HR | 95%CI | *p* |  | HR | 95%CI | *p* |
| Sex (male/female) | 1.230 | 0.959-1.578 | 0.102 |  |  |  |  |
| Age (≥60/<60 years) | 1.038 | 0.858-1.256 | 0.698 |  |  |  |  |
| HBV (positive/negative) | 0.666 | 0.551-0.804 | <0.001 |  | 0.613 | 0.497-0.755 | <0.001 |
| HCV (positive/negative) | 0.161 | 0.039-0.670 | 0.012 |  | 0.138 | 0.032-0.602 | 0.008 |
| Alcoholism (positive/negative) | 1.147 | 0.946-1.391 | 0.164 |  |  |  |  |
| Diabetes mellitus (positive/negative) | 1.076 | 0.794-1.458 | 0.638 |  |  |  |  |
| Hypertension (positive/negative) | 0.931 | 0.720-1.204 | 0.586 |  |  |  |  |
| Child-Pugh class (B + C/A) | 3.510 | 2.881-4.276 | <0.001 |  | 2.310 | 1.836-2.907 | <0.001 |
| ALBI grade (2+3/1) | 3.387 | 2.61-4.396 | <0.001 |  | 1.894 | 1.414-2.535 | <0.001 |
| AFP (≥ 400/< 400 ng/ml) | 0.902 | 0.743-1.095 | 0.297 |  |  |  |  |
| Platelet (≥ 100000/< 100000/μL) | 1.48 | 1.189-1.843 | <0.001 |  | 1.493 | 1.152-1.935 | 0.002 |
| ALT (≥ 40/< 40 U/L) | 2.493 | 2.043-3.041 | <0.001 |  | 2.023 | 1.634-2.504 | <0.001 |
| Leukocyte (≥ 4000/< 4000/μL) | 1.381 | 1.060-1.798 | 0.017 |  | 1.129 | 0.828-1.539 | 0.444 |
| BCLC stage |  |  | <0.001 |  |  |  | 0.301 |
| 0/A | 1.000 |  |  |  | 1.000 |  |  |
| B | 1.249 | 0.847-1.843 | 0.262 |  | 1.029 | 0.642-1.652 | 0.904 |
| C | 2.642 | 1.980-3.526 | <0.001 |  | 1.440 | 0.931-2.228 | 0.102 |
| D | 5.102 | 2.924-8.901 | <0.001 |  | 1.447 | 0.747-2.803 | 0.273 |
| Number of tumor (≥ 2/< 2) | 1.535 | 1.243-1.897 | <0.001 |  | 1.063 | 0.811-1.393 | 0.657 |
| Tumor diameter (≥ 5/< 5 cm) | 1.647 | 1.350-2.010 | <0.001 |  | 1.135 | 0.905-1.424 | 0.274 |
| PVTT (positive/negative) | 2.012 | 1.661-2.436 | <0.001 |  | 1.342 | 1.041-1.730 | 0.023 |
| Lymph node metastasis (yes/no) | 1.841 | 1.523-2.227 | <0.001 |  | 1.226 | 0.940-1.599 | 0.133 |
| Extrahepatic metastases (yes/no) | 1.611 | 1.245-2.084 | <0.001 |  | 1.028 | 0.769-1.374 | 0.854 |
| Abbreviations: HBV, hepatitis B virus; ALBI, albumin-bilirubin; ALP, alkaline phosphatase; LDH, lactate dehydrogenase; AFP, alpha-fetoprotein; ALT, alanine aminotransferase; BCLC, Barcelona Clinic Liver Cancer; PVTT, portal vein tumor thrombus. | | | | | | | |

**Supplementary Fig. 1** Kaplan–Meier plots for overall survival in the supportive care group (A), surgery group (B), RFA group (C), TACE group (D), targeted therapy plus ICI group (E), adjuvant TACE group (F), and other treatment modalities group (G). Abbreviations: RFA, radiofrequency ablation; TACE, transcatheter arterial chemoembolization; ICI, immune checkpoint inhibitor; ALP, alkaline phosphatase.

**
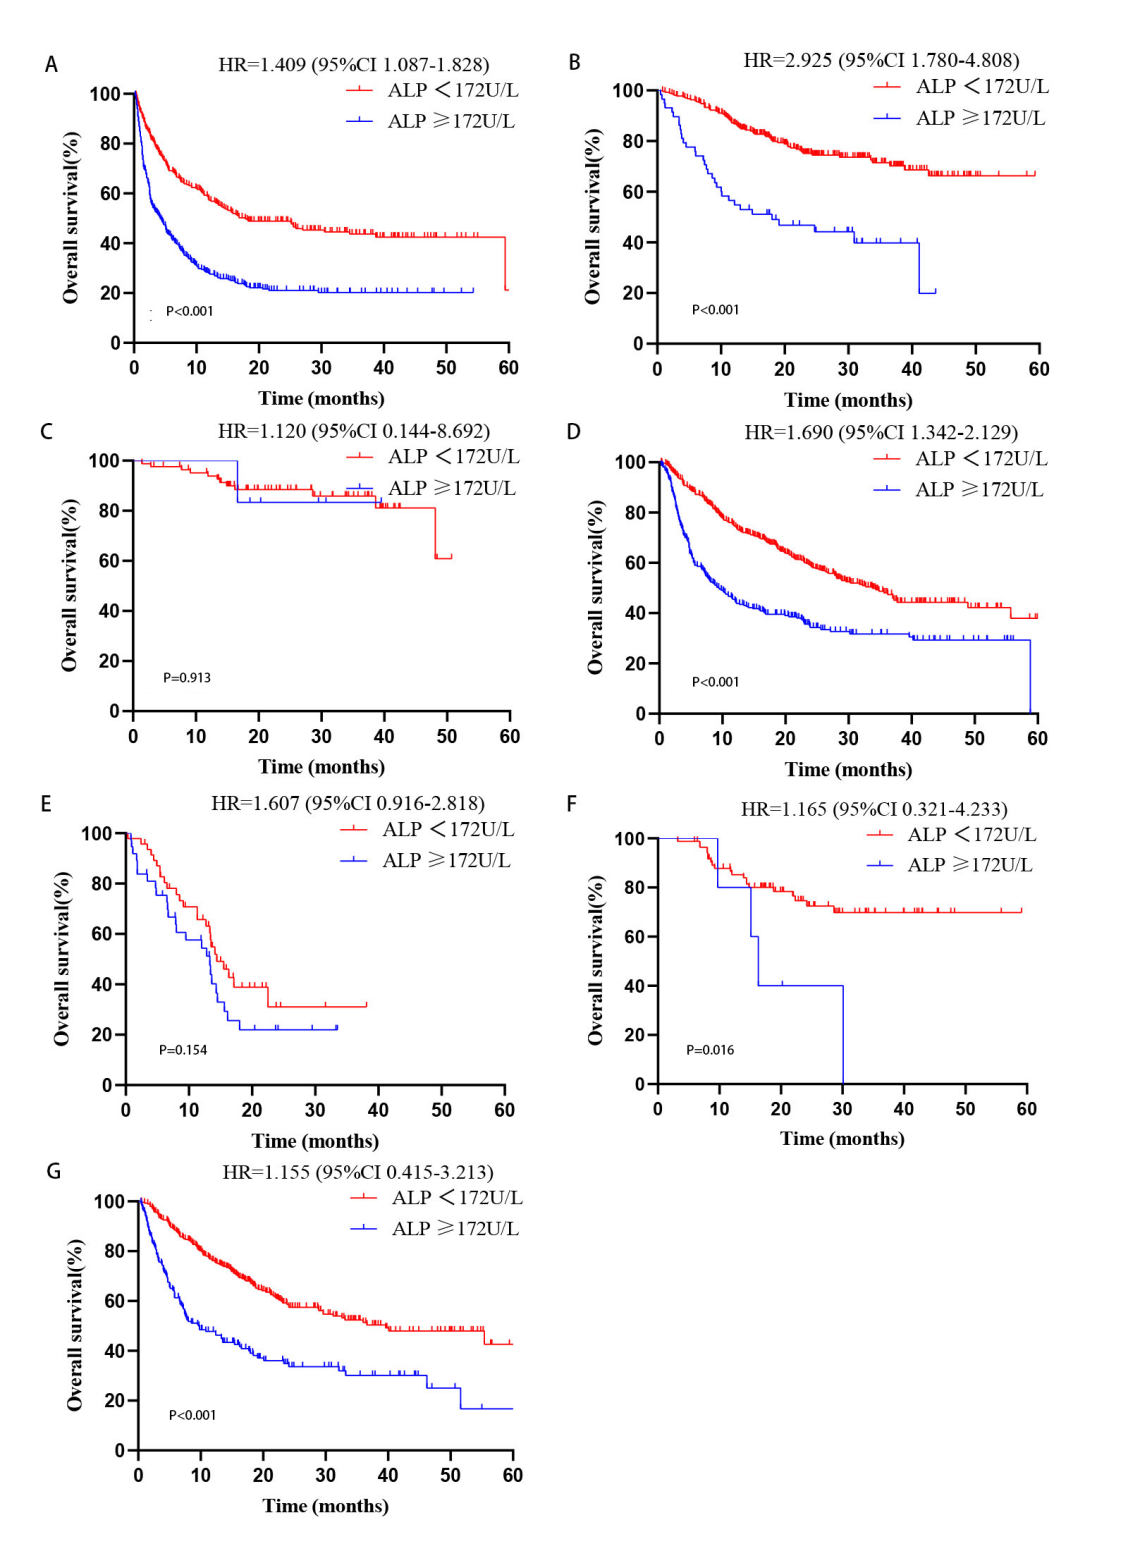
**

**Supplementary Fig. 2** Kaplan–Meier plots for overall survival in the supportive care group (A), surgery group (B), RFA group (C), TACE group (D), targeted therapy plus ICI group (E), adjuvant TACE group (F), and other treatment modalities group (G). Abbreviations: RFA, radiofrequency ablation; TACE, transcatheter arterial chemoembolization; ICI, immune checkpoint inhibitor; LDH, lactate dehydrogenase.

**
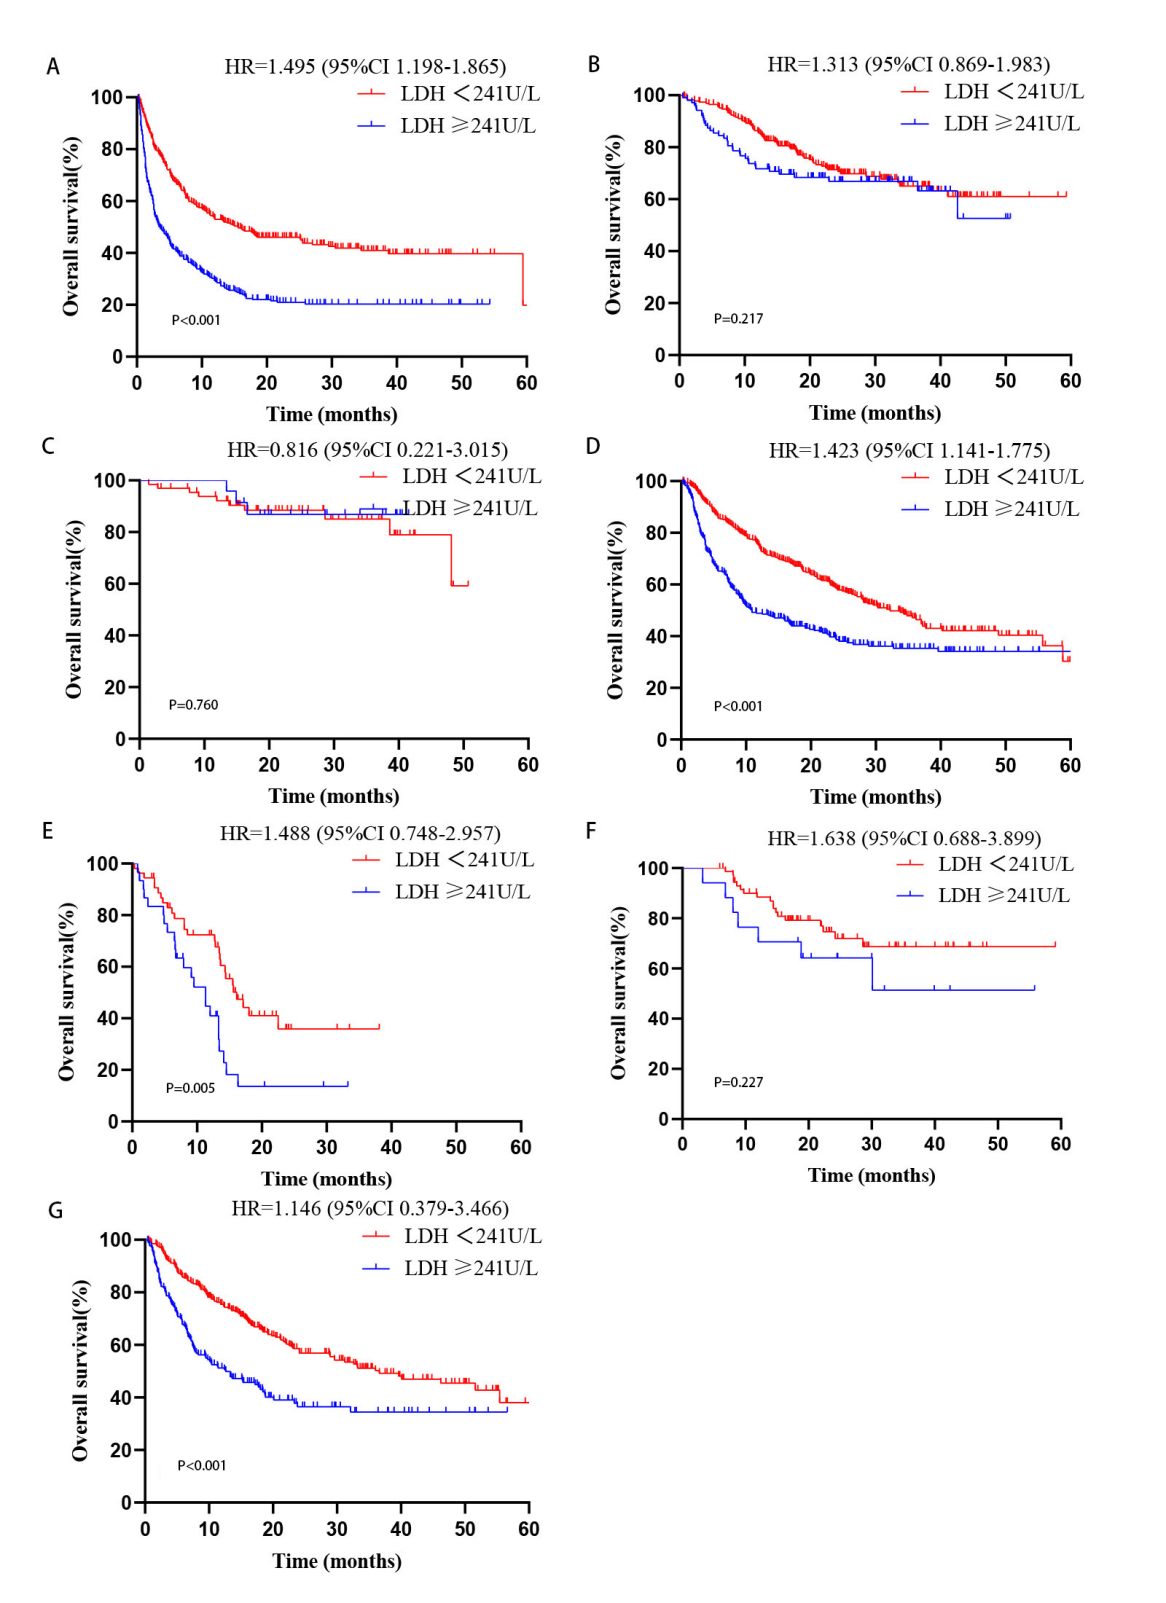
**

**Supplementary Fig. 3** Time-dependent receiver operating characteristic curves for validation set (A), alkaline phosphatase (B), lactate dehydrogenase (C), Barcelona Clinic Liver Cancer (D), Child-Pugh class (E), extrahepatic metastasis (F), treatment (G), and tumor diameter (H).


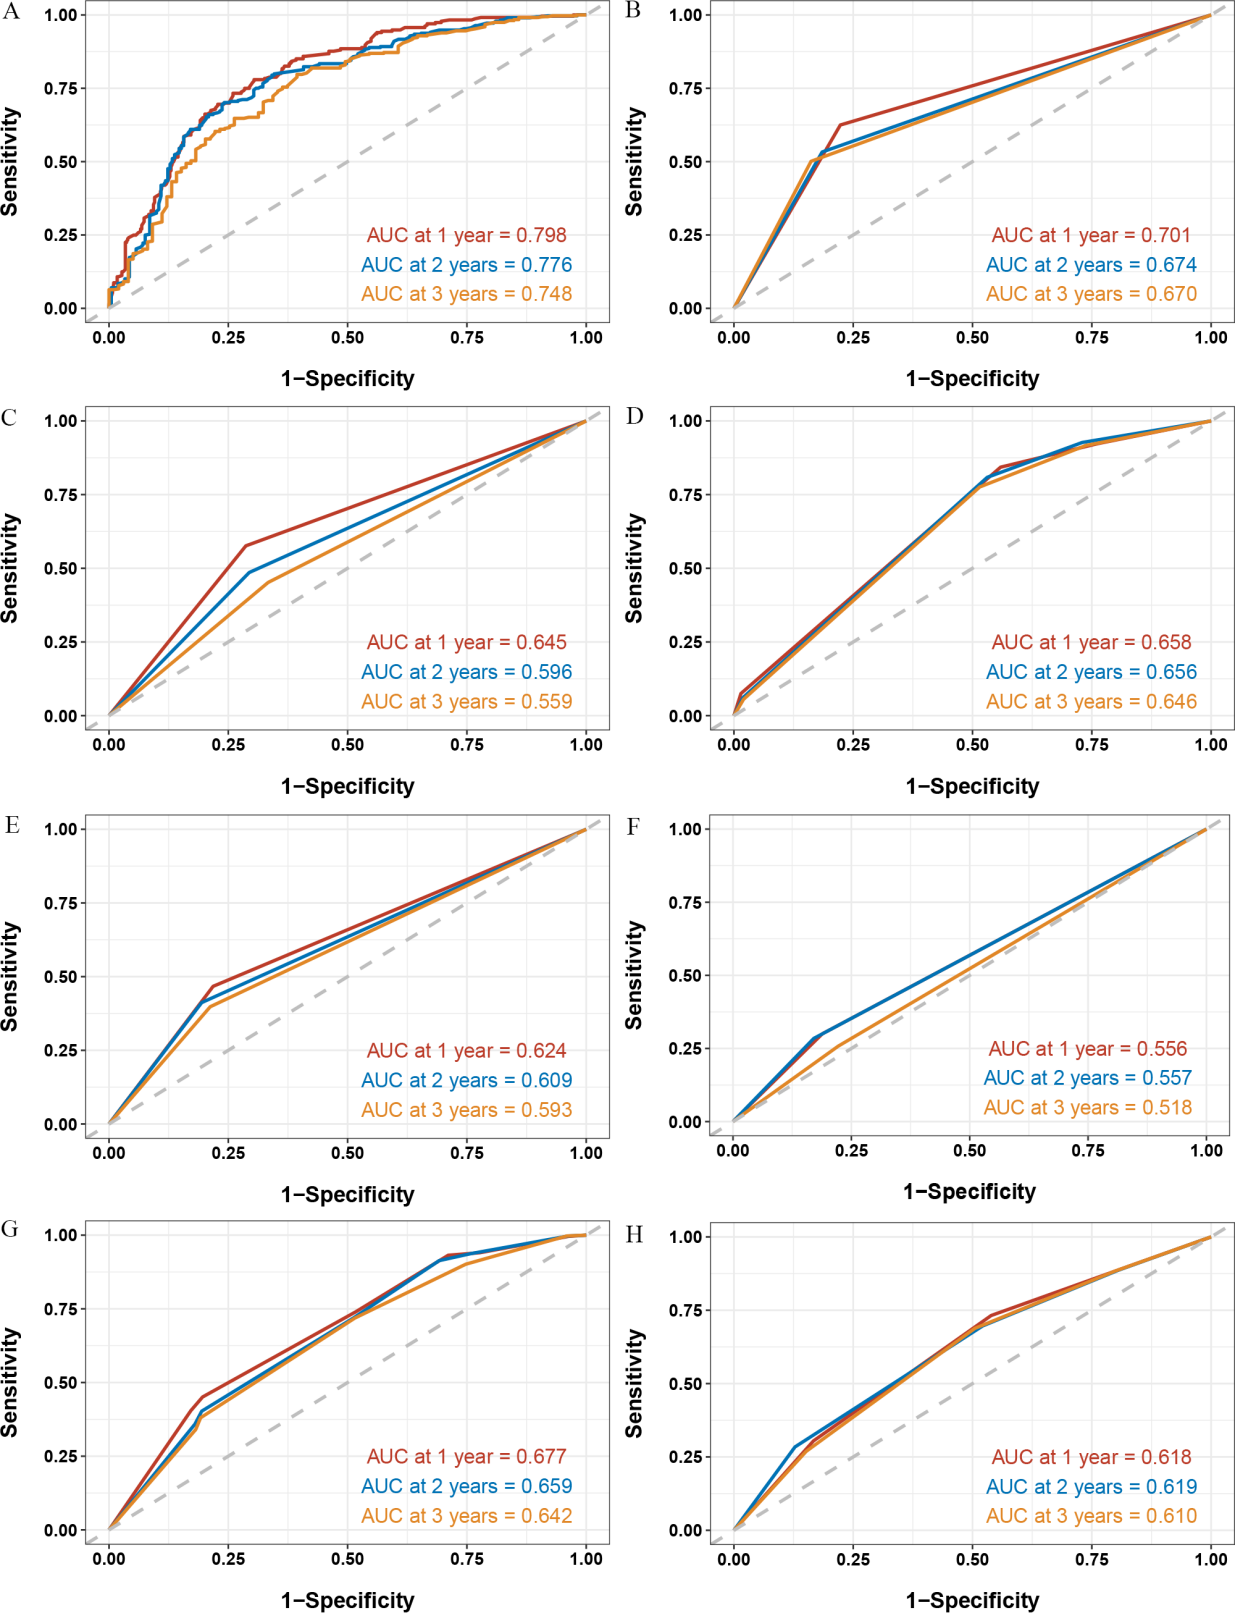


**Supplementary Fig. 4** Calibration curves (**A**) and decision curve analyses (**B**) in the validation cohorts.


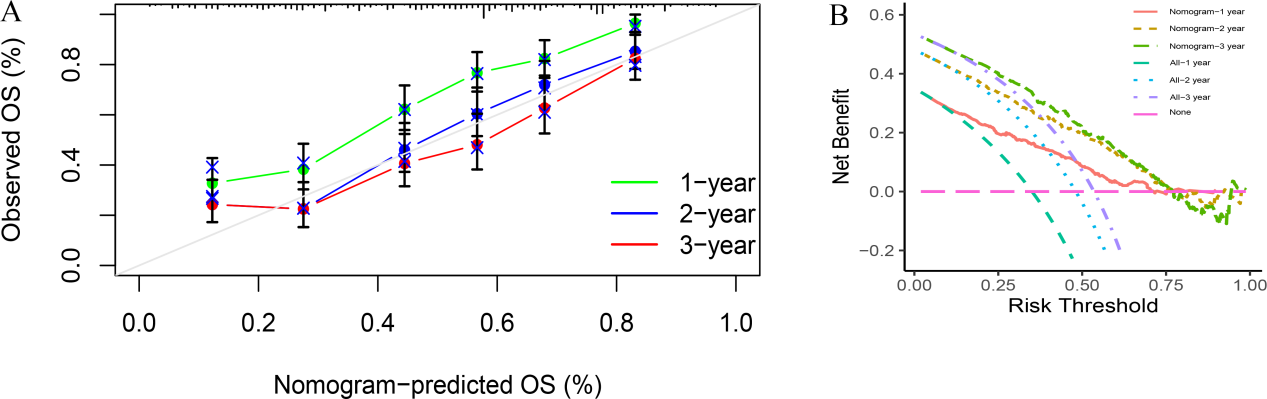


**Supplementary Fig. 5** Kaplan–Meier plots for overall survival in the all set (A), training set (B), and validation set (C).

**
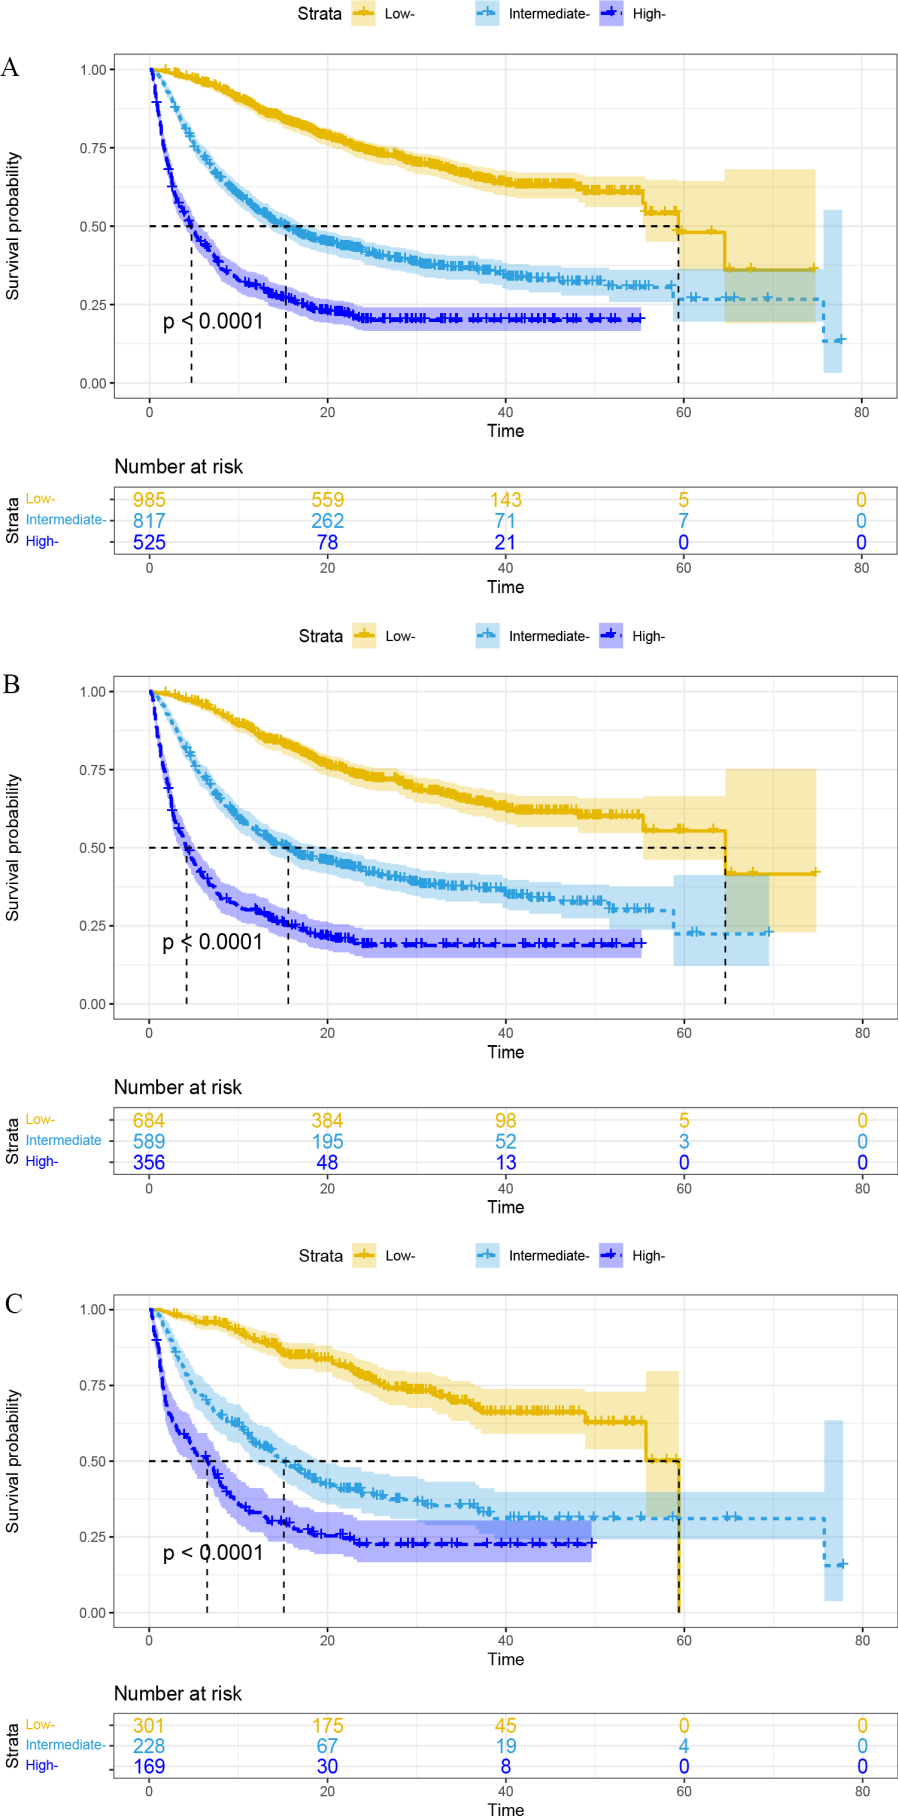
**

**Supplementary Fig. 6** Kaplan–Meier plots for overall survival based on ALP/LDH grouping.


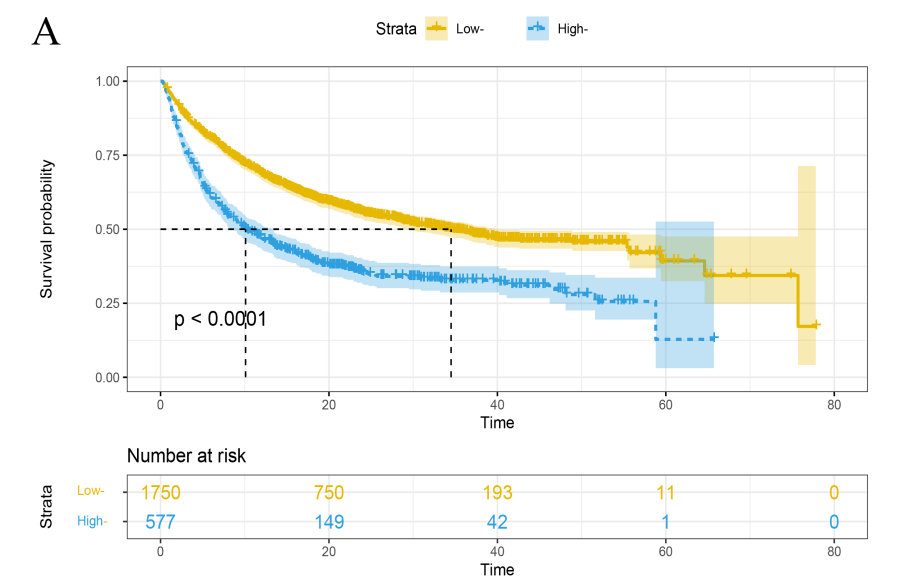

Supplement: Supplementary file 1 [file get_supplementary_file.php]
